# Supplementary material for: Multi-stage spiral-type structured catalyst system for direct large-scale methanation of industrial CO2 emissions: a feasibility study
Source: Royal Society of Chemistry journal article supplement (doi:10.1039/d4re00606b), 2025-01-01
Supplement: d4re00606b1.pdf [file d4re00606b1.pdf]

## **Multi-stage spiral-type structured catalyst system for direct large-scale methanation of industrial CO<sub>2</sub> emissions: A feasibility study**

Hiroshi Akama<sup>a</sup>, Ryo Watanabe<sup>a</sup>, Priyanka Verma<sup>b</sup>, Choji Fukuhara<sup>a,\*</sup>

*a) Department of Applied Chemistry and Biochemical Engineering, Graduate School of Engineering, Shizuoka University,  
3-5-1 Johoku, Naka-ku, Hamamatsu, Shizuoka 432-8561, Japan*

*b) Department of Chemistry, Indian Institute of Technology Delhi, Hauz Khas, New Delhi, 110016, India*

(\*) corresponding author: [fukuhara.choji@shizuoka.ac.jp](mailto:fukuhara.choji@shizuoka.ac.jp)

Fig. S1. (a) The spiral-shaped aluminum plate substrate and (b) Spiral-type structured catalyst prepared by wash-coating on the twisted aluminum plate.

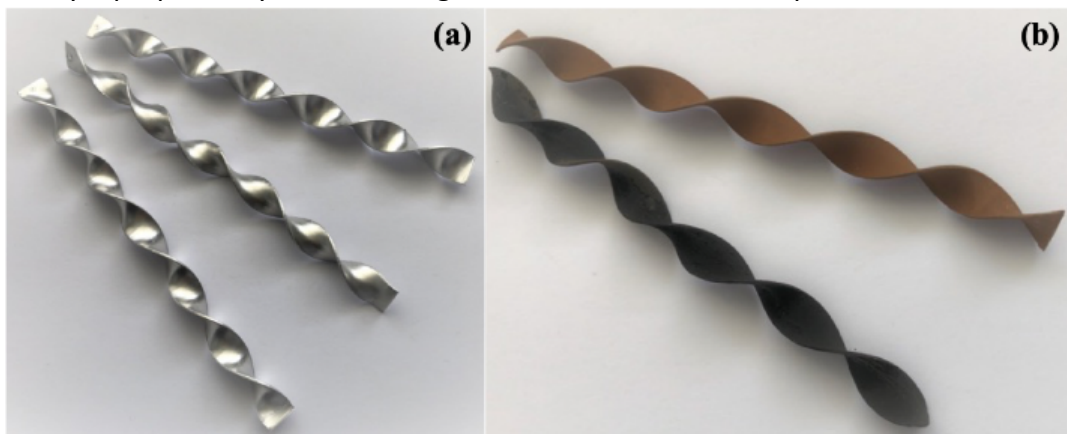

Fig. S2. Reactor with insulation made of alkaline earth silicate around the reaction glass tube.
